# Supplementary material for: Explaining crystallization preferences of two polyphenolic diastereoisomers by crystal structure prediction
Source: Royal Society of Chemistry journal article supplement (doi:10.1039/c8ce01783b), 2018-11-27
Supplement: c8ce01783b1.pdf [file c8ce01783b1.pdf]

**Supporting Information**

to

**Explaining crystallization preferences of two polyphenolic diastereoisomers by crystal structure prediction.**

Marta K. Dudek,<sup>1,2</sup> Graeme M. Day<sup>1</sup>

*1 Computational Systems Chemistry, School of Chemistry, University of Southampton, SO17 1BJ, UK, M.Dudek@soton.ac.uk*

*2 Center of Molecular & Macromolecular Studies PAS, Lodz, Poland*

|                                                                                                                                    |          |
|------------------------------------------------------------------------------------------------------------------------------------|----------|
| <b>Known crystal structures of EPI and CAT</b>                                                                                     | <b>2</b> |
| <b>Crystallization screening</b>                                                                                                   | <b>2</b> |
| <b>Comparison of 10000 and 2000-structure data sets for unsolvated EPI experimental structure and for all best EPI structures.</b> | <b>3</b> |
| <b>Procedure used for the comparison of the solvated and unsolvated structures of EPI and CAT</b>                                  | <b>3</b> |
| <b>Numerical data for CAT</b>                                                                                                      | <b>4</b> |
| <b>Numerical data for EPI</b>                                                                                                      | <b>8</b> |

## 1. Known crystal structures of EPI and CAT

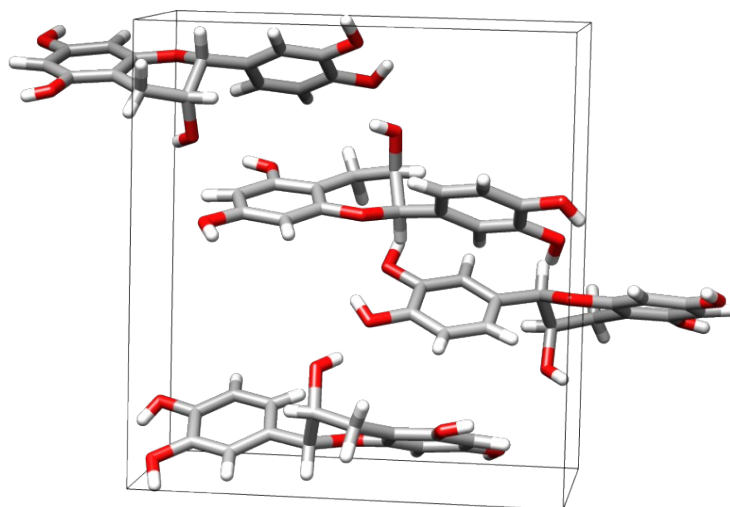

**Figure S1.** Experimental structure of EPI

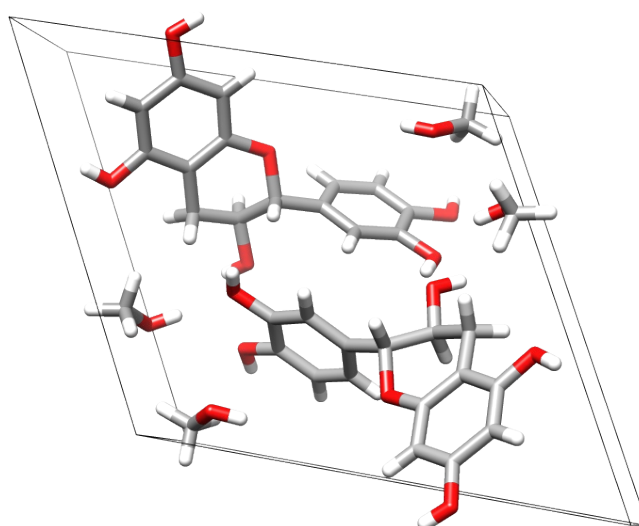

**Figure S2.** Experimental structure of CAT methanol solvate

## 2. Crystallization screening

The propensity of CAT to form different solvates were exploited via three different methods, yielding in most cases the same results: classic wet crystallization, mechanochemical grinding with 0.5:1, 1:1 and 2:1 stoichiometric ratios of solvents, and vapour diffusion of a solvent. All tested solvents were polar (at least partially), and included water, methanol, ethanol, isopropanol, n-butanol and acetone. In all cases the obtained phases after crystallization were examined with  $^{13}\text{C}$  solid-state NMR. New solvents were obtained for methanol, ethanol, acetone and isopropanol. Their respective structures are currently under further studies.<sup>1</sup>

### 3. Comparison of 10000 and 2000-structure data sets for unsolvated EPI experimental structure and for all best EPI structures.

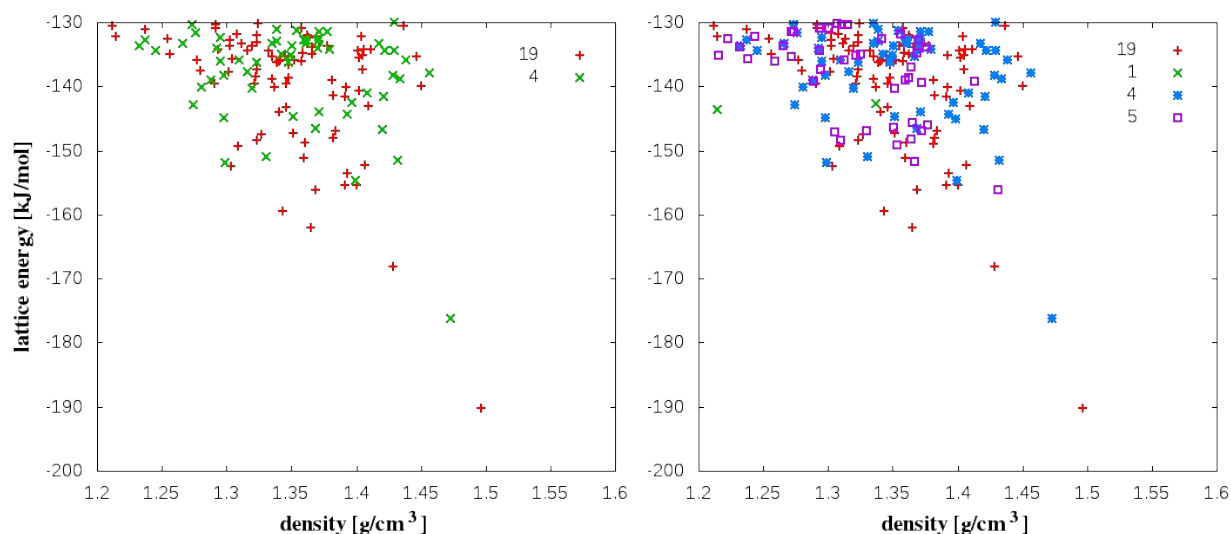

**Figure S3.** Comparison for 2000- (left) and 10000-structures (right) data sets used in the CSP search for EPI experimental structure. In 2000-structures set only two space groups were tested, in 10000-structures set – four space group were tested. Clearly all the most stable structures were found in the smaller set, with energies of the C2 and P1 structures found to be well above the global minimum.

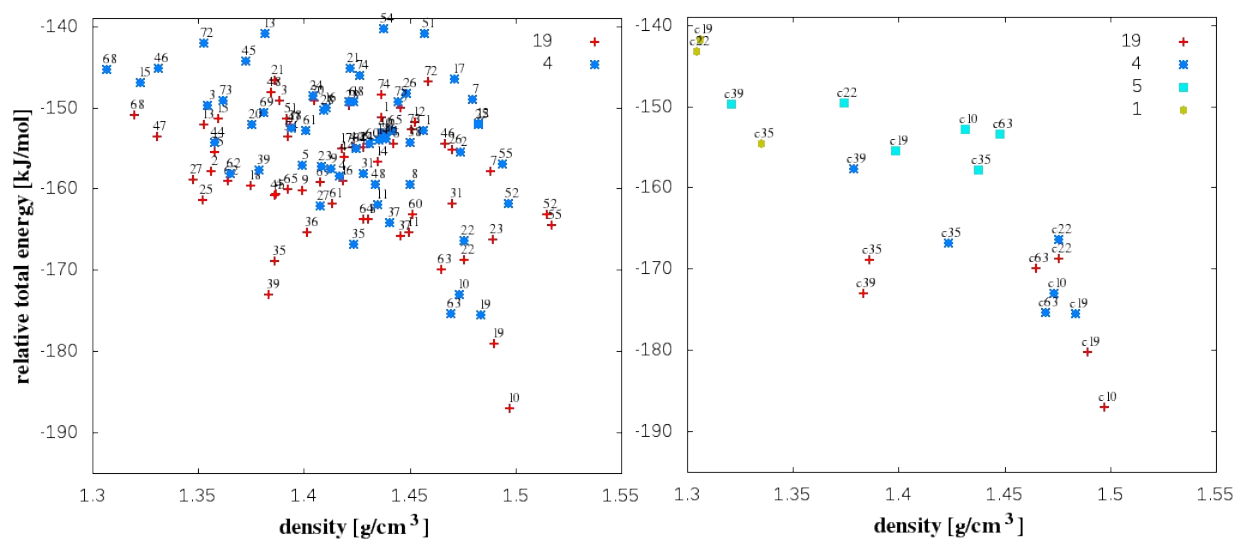

**Figure S4.** Comparison for 2000- (left) and 10000-structures (right) data sets used in the CSP search for EPI experimental structure. In 2000-structures set only two space groups were tested, in 10000-structures set – four space group were tested. The most stable structures were found in the smaller set, with energies of the C2 and P1 structures found to be well above the global minimum.

### 4. Procedure used for the comparison of the solvated and unsolvated structures of EPI and CAT

For the comparison of the unsolvated and differently solvated structures following equation and data were used:

$$E_{comp}^{tot} = E_{solv}^{tot} - N * (E_{methanol}^{intra} + E_{methanol}^{inter} - 3/2 * RT)$$

$$E_{\text{methanol}}^{\text{intra}} = -303921 \text{ kJ/mol}$$

$$E_{\text{methanol}}^{\text{inter}} = -44.439 \text{ kJ/mol}$$

$$T = 300 \text{ K}$$

## 5. Numerical data for CAT

### Naming convention for the conformers

A following convention was used for the names of conformers: a letter 'e' or 'k' stands for epicatechin and catechin, respectively, followed by a number of conformer obtained after sorting the conformers from the lowest energy to the highest at the stage of the first MMFF optimization, and finally, after an underscore a space group in which certain structure was generated is given.

**Table S1.** Final numerical data obtained for the best structures of CAT in  $P2_1$  and  $P2_12_12_1$  space groups, together with relative energies obtained from the gas phase calculations (Eintra).

| name   | unsolvated |         |        | 2:1 solvates |         |        | 1:1 solvates |         |        |        |
|--------|------------|---------|--------|--------------|---------|--------|--------------|---------|--------|--------|
|        | Eintra     | density | Etotal | Einter       | density | Etotal | Einter       | density | Etotal | Einter |
| k10_19 | 5.91       | 1.4231  | 36.95  | 46.75        | 1.2763  | 18.99  | 35.80        | 1.3736  | 25.82  | 64.14  |
| k10_4  | 5.91       | 1.3285  | 37.08  | 46.88        | 1.262   | 27.06  | 43.88        | 1.2805  | 16.94  | 55.27  |
| k11_19 | 19.42      | 1.468   | 42.64  | 38.93        | 1.3417  | 24.42  | 27.73        | 1.3778  | 33.05  | 57.87  |
| k11_4  | 19.42      | 1.3933  | 43.35  | 39.64        | 1.294   | 29.41  | 32.72        | 1.3033  | 32.05  | 56.87  |
| k12_19 | 19.95      | 1.3895  | 39.26  | 35.01        | 1.3287  | 27.03  | 29.81        | 1.3564  | 24.54  | 48.82  |
| k12_4  | 19.95      | 1.3964  | 40.17  | 35.92        | 1.361   | 24.90  | 27.67        | 1.3378  | 37.39  | 61.67  |
| k13_19 | 21.07      | 1.4822  | 32.99  | 27.62        | 1.316   | 25.71  | 27.36        | 1.4504  | 36.22  | 59.38  |
| k13_4  | 21.07      | 1.4037  | 48.37  | 43.00        | 1.2702  | 29.71  | 31.36        | 1.3631  | 31.65  | 54.81  |
| k14_19 | 20.68      | 1.4712  | 31.77  | 26.79        | 1.3889  | 20.26  | 22.31        | 1.3885  | 28.83  | 52.39  |
| k14_4  | 20.68      | 1.3603  | 35.71  | 30.74        | 1.3418  | 32.06  | 34.10        | 1.3553  | 25.86  | 49.42  |
| k15_19 | 11.45      | 1.3439  | 23.30  | 27.55        | 1.3093  | 11.95  | 23.23        | 1.3691  | 7.32   | 40.10  |
| k15_4  | 11.45      | 1.4623  | 21.60  | 25.85        | 1.365   | 6.86   | 18.13        | 1.3972  | 5.15   | 37.93  |
| k16_19 | 13.03      | 1.3437  | 16.37  | 19.05        | 1.3165  | 2.99   | 12.69        | 1.3749  | 15.35  | 46.56  |
| k16_4  | 13.03      | 1.4287  | 30.86  | 33.54        | 1.2412  | 13.85  | 23.55        | 1.3994  | 19.16  | 50.37  |
| k17_19 | 13.40      | 1.3551  | 23.82  | 26.14        | 1.2632  | 19.58  | 28.90        | 1.3595  | 22.40  | 53.24  |
| k17_4  | 13.40      | 1.3897  | 21.02  | 23.33        | 1.3016  | 20.30  | 29.63        | 1.3035  | 20.33  | 51.16  |
| k18_19 | 0.00       | 1.5127  | 9.12   | 24.83        | 1.3545  | 12.26  | 34.98        | 1.35    | 7.78   | 52.01  |
| k18_4  | 0.00       | 1.5004  | 13.00  | 28.71        | 1.326   | 7.18   | 29.90        | 1.435   | 4.30   | 48.54  |
| k19_19 | 2.28       | 1.4222  | 22.37  | 35.80        | 1.3688  | 4.61   | 25.06        | 1.429   | 11.03  | 52.98  |
| k19_4  | 2.28       | 1.4716  | 26.93  | 40.35        | 1.3127  | 10.51  | 30.96        | 1.4393  | 12.48  | 54.43  |
| k1_19  | 2.67       | 1.5207  | 33.92  | 46.96        | 1.3545  | 22.85  | 42.90        | 1.3967  | 25.54  | 67.11  |
| k1_4   | 2.67       | 1.4037  | 32.18  | 45.22        | 1.3671  | 15.70  | 35.75        | 1.4343  | 26.78  | 68.34  |
| k20_19 | 15.57      | 1.5073  | 22.87  | 23.01        | 1.3215  | 21.44  | 28.60        | 1.3282  | 18.75  | 47.42  |
| k20_4  | 15.56      | 1.3911  | 21.95  | 22.10        | 1.3023  | 15.90  | 23.06        | 1.319   | 24.82  | 53.49  |
| k21_19 | 2.46       | 1.3637  | 13.94  | 27.19        | 1.3793  | 2.85   | 23.12        | 1.3752  | 12.24  | 54.02  |
| k21_4  | 2.46       | 1.4502  | 30.94  | 44.19        | 1.3871  | 9.87   | 30.14        | 1.3758  | 5.99   | 47.77  |

|        |       |        |       |       |        |       |       |        |       |       |
|--------|-------|--------|-------|-------|--------|-------|-------|--------|-------|-------|
| k22_19 | 2.32  | 1.3579 | 24.90 | 38.28 | 1.2736 | 16.73 | 37.13 | 1.4473 | 21.76 | 63.67 |
| k22_4  | 2.32  | 1.4264 | 20.33 | 33.72 | 1.31   | 15.78 | 36.18 | 1.3567 | 8.51  | 50.42 |
| k23_19 | 17.47 | 1.4661 | 26.32 | 24.56 | 1.3383 | 12.17 | 17.42 | 1.3205 | 21.44 | 48.21 |
| k23_4  | 17.47 | 1.3883 | 34.58 | 32.82 | 1.2904 | 24.46 | 29.72 | 1.3425 | 25.51 | 52.27 |
| k24_19 | 3.52  | 1.4711 | 27.55 | 39.74 | 1.3546 | 19.84 | 39.05 | 1.3525 | 14.66 | 55.37 |
| k24_4  | 3.52  | 1.4218 | 20.43 | 32.62 | 1.3111 | 17.94 | 37.15 | 1.3477 | 19.78 | 60.50 |
| k25_19 | 18.57 | 1.3902 | 30.81 | 27.94 | 1.3352 | 18.96 | 23.11 | 1.327  | 30.43 | 56.09 |
| k25_4  | 18.58 | 1.4522 | 39.27 | 36.40 | 1.3132 | 23.68 | 27.83 | 1.3297 | 23.88 | 49.54 |
| k26_19 | 18.31 | 1.3281 | 45.35 | 42.75 | 1.32   | 21.63 | 26.05 | 1.3221 | 26.17 | 52.09 |
| k26_4  | 18.30 | 1.4394 | 41.84 | 39.25 | 1.3306 | 23.10 | 27.52 | 1.3932 | 34.78 | 60.71 |
| k27_19 | 6.56  | 1.3918 | 29.23 | 38.38 | 1.3528 | 14.51 | 30.68 | 1.2903 | 21.23 | 58.91 |
| k27_4  | 6.56  | 1.3991 | 40.06 | 49.21 | 1.302  | 24.63 | 40.80 | 1.341  | 22.02 | 59.69 |
| k28_19 | 6.40  | 1.4504 | 20.29 | 29.60 | 1.3292 | 14.05 | 30.38 | 1.3788 | 16.90 | 54.74 |
| k28_4  | 6.40  | 1.4789 | 25.01 | 34.32 | 1.3425 | 17.01 | 33.34 | 1.3677 | 14.17 | 52.00 |
| k29_19 | 6.78  | 1.3936 | 38.16 | 47.09 | 1.2916 | 12.61 | 28.56 | 1.2657 | 21.04 | 58.50 |
| k29_4  | 6.78  | 1.3281 | 41.40 | 50.33 | 1.3129 | 17.00 | 32.94 | 1.3637 | 25.80 | 63.26 |
| k2_19  | 17.12 | 1.5023 | 25.20 | 23.79 | 1.28   | 21.53 | 27.14 | 1.4127 | 26.66 | 53.78 |
| k2_4   | 17.12 | 1.446  | 36.72 | 35.32 | 1.3486 | 11.55 | 17.16 | 1.3817 | 21.97 | 49.08 |
| k30_19 | 21.40 | 1.3226 | 47.14 | 41.44 | 1.2844 | 21.03 | 22.36 | 1.3579 | 35.56 | 58.40 |
| k30_4  | 21.40 | 1.4074 | 48.20 | 42.51 | 1.3129 | 18.99 | 20.31 | 1.3403 | 31.82 | 54.66 |
| k31_19 | 17.23 | 1.3569 | 46.75 | 45.22 | 1.3543 | 27.09 | 32.58 | 1.3779 | 34.04 | 61.04 |
| k31_4  | 17.23 | 1.384  | 49.66 | 48.14 | 1.254  | 40.70 | 46.19 | 1.3398 | 32.46 | 59.46 |
| k32_19 | 35.89 | 1.4481 | 43.75 | 23.56 | 1.2272 | 32.28 | 19.11 | 1.4512 | 33.39 | 41.73 |
| k32_4  | 35.89 | 1.368  | 53.96 | 33.78 | 1.3467 | 31.35 | 18.19 | 1.3945 | 43.25 | 51.59 |
| k33_19 | 21.92 | 1.3688 | 46.13 | 39.91 | 1.3267 | 26.79 | 27.59 | 1.4489 | 28.06 | 50.37 |
| k33_4  | 21.92 | 1.4032 | 54.38 | 48.17 | 1.2761 | 36.46 | 37.26 | 1.3808 | 25.14 | 47.45 |
| k34_19 | 35.90 | 1.5071 | 46.47 | 26.28 | 1.3052 | 30.79 | 17.62 | 1.3905 | 39.47 | 47.80 |
| k34_4  | 35.90 | 1.4248 | 51.42 | 31.23 | 1.3081 | 36.67 | 23.49 | 1.3766 | 27.33 | 35.67 |
| k35_19 | 6.23  | 1.4395 | 33.98 | 43.46 | 1.3167 | 25.73 | 42.22 | 1.3846 | 23.09 | 61.09 |
| k35_4  | 6.23  | 1.4264 | 36.01 | 45.49 | 1.3677 | 22.00 | 38.50 | 1.4028 | 34.37 | 72.37 |
| k36_19 | 23.51 | 1.3469 | 42.48 | 34.68 | 1.3209 | 19.40 | 18.61 | 1.3148 | 12.56 | 33.28 |
| k36_4  | 23.51 | 1.5082 | 45.08 | 37.28 | 1.3656 | 17.84 | 17.06 | 1.4052 | 18.35 | 39.08 |
| k37_19 | 2.68  | 1.5208 | 34.01 | 47.04 | 1.348  | 22.54 | 42.59 | 1.3846 | 23.09 | 61.09 |
| k37_4  | 2.68  | 1.4033 | 32.31 | 45.34 | 1.3671 | 15.71 | 35.76 | 1.4342 | 26.65 | 68.21 |
| k38_19 | 16.79 | 1.3453 | 37.34 | 36.26 | 1.3044 | 22.72 | 28.66 | 1.3735 | 29.27 | 56.71 |
| k38_4  | 16.79 | 1.3897 | 51.11 | 50.02 | 1.3384 | 14.00 | 19.94 | 1.4106 | 26.88 | 54.32 |
| k39_19 | 18.28 | 1.4856 | 41.02 | 38.45 | 1.2374 | 25.92 | 30.36 | 1.359  | 27.87 | 53.82 |
| k39_4  | 18.28 | 1.2747 | 47.70 | 45.13 | 1.3056 | 30.99 | 35.43 | 1.3011 | 37.60 | 63.55 |
| k3_19  | 17.34 | 1.4812 | 31.32 | 29.69 | 1.2522 | 18.14 | 23.52 | 1.4204 | 17.94 | 44.84 |
| k3_4   | 17.34 | 1.4458 | 30.20 | 28.57 | 1.3704 | 17.17 | 22.56 | 1.4004 | 16.49 | 43.39 |
| k40_19 | 23.75 | 1.3676 | 29.39 | 21.35 | 1.3273 | 22.48 | 21.46 | 1.3909 | 25.16 | 45.64 |
| k40_4  | 23.75 | 1.4478 | 46.28 | 38.24 | 1.2883 | 10.85 | 9.83  | 1.2125 | 23.95 | 44.44 |
| k41_19 | 18.95 | 1.3658 | 34.68 | 31.44 | 1.2582 | 32.43 | 36.21 | 1.4236 | 28.36 | 53.64 |
| k41_4  | 18.95 | 1.4061 | 56.12 | 52.88 | 1.319  | 34.78 | 38.55 | 1.3368 | 31.85 | 57.13 |
| k42_19 | 38.45 | 1.4745 | 44.66 | 21.91 | 1.2711 | 21.44 | 5.71  | 1.3722 | 28.71 | 34.49 |
| k42_4  | 38.45 | 1.3883 | 39.49 | 16.75 | 1.3391 | 29.05 | 13.32 | 1.41   | 14.22 | 20.01 |

|        |       |        |       |       |        |       |       |        |       |       |
|--------|-------|--------|-------|-------|--------|-------|-------|--------|-------|-------|
| k43_19 | 38.26 | 1.3584 | 27.10 | 4.55  | 1.2752 | 24.26 | 8.73  | 1.407  | 30.28 | 36.26 |
| k43_4  | 38.26 | 1.2496 | 50.03 | 27.48 | 1.3412 | 19.27 | 3.73  | 1.3857 | 22.11 | 28.09 |
| k44_19 | 18.49 | 1.4455 | 47.58 | 44.80 | 1.3062 | 22.89 | 27.12 | 1.3041 | 34.99 | 60.73 |
| k44_4  | 18.49 | 1.3917 | 48.86 | 46.08 | 1.2996 | 29.03 | 33.26 | 1.2845 | 36.13 | 61.87 |
| k45_19 | 5.38  | 1.4421 | 23.83 | 34.16 | 1.3529 | 15.00 | 32.35 | 1.4195 | 10.11 | 48.96 |
| k45_4  | 5.38  | 1.4554 | 14.50 | 24.83 | 1.3667 | 12.50 | 29.85 | 1.4185 | 8.52  | 47.37 |
| k48_19 | 10.50 | 1.4053 | 31.23 | 36.44 | 1.2966 | 24.55 | 36.77 | 1.3514 | 21.88 | 55.61 |
| k48_4  | 10.50 | 1.4629 | 40.30 | 45.50 | 1.2973 | 25.71 | 37.94 | 1.3476 | 26.82 | 60.54 |
| k4_19  | 3.47  | 1.427  | 27.26 | 39.50 | 1.3183 | 14.54 | 33.79 | 1.4415 | 18.26 | 59.03 |
| k4_4   | 3.47  | 1.4836 | 26.40 | 38.64 | 1.3655 | 20.65 | 39.91 | 1.4189 | 16.55 | 57.32 |
| k51_19 | 10.57 | 1.4239 | 26.86 | 32.00 | 1.341  | 22.19 | 34.35 | 1.4375 | 23.54 | 57.21 |
| k51_4  | 10.57 | 1.3793 | 38.27 | 43.41 | 1.3696 | 21.93 | 34.08 | 1.3764 | 21.21 | 54.87 |
| k54_19 | 11.95 | 1.4997 | 38.31 | 42.07 | 1.3159 | 17.16 | 27.93 | 1.3249 | 26.16 | 58.44 |
| k54_4  | 11.95 | 1.3795 | 36.49 | 40.25 | 1.3696 | 21.93 | 34.08 | 1.3071 | 24.84 | 57.13 |
| k56_19 | 12.45 | 1.3643 | 35.73 | 38.99 | 1.3202 | 21.41 | 31.69 | 1.3626 | 23.74 | 55.52 |
| k56_4  | 12.45 | 1.4069 | 43.94 | 47.20 | 1.2953 | 17.18 | 27.45 | 1.397  | 27.86 | 59.64 |
| k58_19 | 31.72 | 1.374  | 27.16 | 20.27 | 1.3195 | 13.82 | 4.82  | 1.4299 | 19.66 | 32.17 |
| k58_4  | 31.72 | 1.3377 | 19.88 | 13.00 | 1.3046 | 8.99  | 0.00  | 1.3755 | 22.07 | 34.59 |
| k5_19  | 5.38  | 1.442  | 23.88 | 34.21 | 1.3529 | 15.02 | 32.36 | 1.4195 | 10.12 | 48.98 |
| k5_4   | 5.38  | 1.4554 | 14.53 | 24.86 | 1.3666 | 12.53 | 29.88 | 1.4185 | 8.57  | 47.42 |
| k60_19 | 15.28 | 1.4379 | 45.38 | 45.81 | 1.3243 | 20.64 | 31.87 | 1.3251 | 30.84 | 59.79 |
| k60_4  | 15.28 | 1.3685 | 46.09 | 46.51 | 1.3273 | 15.52 | 22.75 | 1.3707 | 32.52 | 61.48 |
| k61_19 | 18.34 | 1.4668 | 27.97 | 34.46 | 1.3254 | 24.42 | 25.03 | 1.4343 | 18.71 | 44.61 |
| k61_4  | 18.34 | 1.454  | 23.89 | 30.39 | 1.3934 | 15.31 | 19.91 | 1.3963 | 23.99 | 49.88 |
| k63_19 | 14.61 | 1.4185 | 41.87 | 42.97 | 1.2967 | 15.32 | 23.43 | 1.3646 | 24.23 | 53.85 |
| k63_4  | 14.61 | 1.4409 | 36.89 | 37.98 | 1.2662 | 27.67 | 35.78 | 1.3285 | 23.82 | 53.44 |
| k64_19 | 19.93 | 1.4416 | 35.82 | 31.60 | 1.314  | 8.73  | 11.52 | 1.3699 | 12.05 | 36.35 |
| k64_4  | 19.93 | 1.3707 | 22.46 | 18.23 | 1.3257 | 9.52  | 12.31 | 1.4521 | 14.96 | 39.26 |
| k65_19 | 16.97 | 1.3996 | 28.42 | 27.16 | 1.3133 | 22.16 | 27.91 | 1.347  | 25.08 | 52.35 |
| k65_4  | 16.97 | 1.3978 | 51.66 | 50.40 | 1.3451 | 22.05 | 27.81 | 1.3345 | 34.66 | 61.92 |
| k66_19 | 16.92 | 1.4488 | 33.91 | 32.70 | 1.3039 | 20.21 | 26.02 | 1.3225 | 26.48 | 53.80 |
| k66_4  | 16.91 | 1.4168 | 48.29 | 47.09 | 1.3132 | 26.12 | 31.93 | 1.3107 | 34.63 | 61.95 |
| k67_19 | 34.21 | 1.4422 | 50.52 | 32.01 | 1.3814 | 28.16 | 16.67 | 1.3837 | 34.81 | 44.83 |
| k67_4  | 34.21 | 1.4479 | 49.23 | 30.72 | 1.3101 | 32.63 | 21.14 | 1.3909 | 45.75 | 55.77 |
| k68_19 | 36.22 | 1.4344 | 33.98 | 13.46 | 1.2567 | 20.34 | 6.84  | 1.29   | 24.47 | 32.48 |
| k68_4  | 36.22 | 1.4125 | 20.52 | 0.00  | 1.3251 | 26.03 | 12.53 | 1.3771 | 24.56 | 32.57 |
| k6_19  | 6.23  | 1.4398 | 33.75 | 43.23 | 1.2884 | 24.49 | 40.98 | 1.3849 | 23.04 | 61.04 |
| k6_4   | 6.23  | 1.4263 | 36.10 | 45.58 | 1.3145 | 18.42 | 34.92 | 1.4028 | 34.42 | 72.43 |
| k72_19 | 22.13 | 1.3233 | 47.39 | 40.97 | 1.2881 | 17.31 | 17.90 | 1.3226 | 27.00 | 49.10 |
| k72_4  | 22.13 | 1.4352 | 54.95 | 48.53 | 1.3106 | 32.44 | 33.03 | 1.3156 | 38.00 | 60.10 |
| k74_19 | 24.00 | 1.3842 | 25.87 | 17.58 | 1.3251 | 18.34 | 17.07 | 1.4153 | 15.29 | 35.52 |
| k74_4  | 24.00 | 1.4499 | 14.94 | 6.65  | 1.3047 | 22.99 | 21.72 | 1.3847 | 22.79 | 43.03 |
| k77_19 | 34.98 | 1.38   | 46.77 | 27.50 | 1.303  | 26.63 | 14.38 | 1.3789 | 33.12 | 42.37 |
| k77_4  | 34.98 | 1.3764 | 47.03 | 27.76 | 1.2942 | 39.46 | 27.21 | 1.3111 | 37.91 | 47.16 |
| k78_19 | 23.75 | 1.3676 | 20.27 | 21.35 | 1.3535 | 14.08 | 13.06 | 1.3908 | 25.19 | 45.68 |
| k78_4  | 23.75 | 1.4478 | 37.17 | 38.25 | 1.3008 | 15.16 | 14.14 | 1.3925 | 28.80 | 49.29 |

|        |       |        |       |       |        |       |       |        |       |       |
|--------|-------|--------|-------|-------|--------|-------|-------|--------|-------|-------|
| k79_19 | 21.40 | 1.3226 | 47.17 | 41.47 | 1.2825 | 24.72 | 26.04 | 1.3581 | 35.53 | 58.36 |
| k79_4  | 21.40 | 1.4073 | 48.18 | 42.48 | 1.3129 | 18.98 | 20.30 | 1.3403 | 31.81 | 54.65 |
| k7_19  | 5.76  | 1.4193 | 18.25 | 28.21 | 1.3375 | 13.27 | 30.24 | 1.4535 | 11.18 | 49.66 |
| k7_4   | 5.76  | 1.378  | 23.51 | 33.46 | 1.365  | 7.94  | 24.91 | 1.367  | 0.00  | 38.48 |
| k80_19 | 23.51 | 1.3469 | 42.47 | 34.67 | 1.3209 | 19.38 | 18.60 | 1.3147 | 12.55 | 33.28 |
| k80_4  | 23.51 | 1.5082 | 45.12 | 37.32 | 1.3655 | 17.82 | 17.04 | 1.4052 | 18.34 | 39.06 |
| k82_19 | 28.62 | 1.3698 | 52.92 | 40.01 | 1.2285 | 32.82 | 26.93 | 1.3327 | 33.83 | 49.44 |
| k82_4  | 28.62 | 1.4322 | 43.79 | 30.88 | 1.2803 | 23.77 | 17.87 | 1.3562 | 30.91 | 46.53 |
| k83_19 | 28.69 | 1.4267 | 48.45 | 35.46 | 1.2284 | 15.99 | 10.02 | 1.3687 | 21.63 | 37.17 |
| k83_4  | 28.70 | 1.378  | 49.07 | 36.09 | 1.3016 | 18.67 | 12.69 | 1.2866 | 28.22 | 43.76 |
| k89_19 | 32.94 | 1.3717 | 52.36 | 35.12 | 1.3123 | 29.29 | 19.07 | 1.3557 | 31.69 | 42.98 |
| k89_4  | 32.94 | 1.4322 | 56.04 | 38.80 | 1.28   | 36.30 | 26.08 | 1.3237 | 41.81 | 53.10 |
| k8_19  | 6.26  | 1.4624 | 29.70 | 39.15 | 1.351  | 19.79 | 36.25 | 1.4284 | 17.48 | 55.45 |
| k8_4   | 6.26  | 1.4587 | 30.61 | 40.06 | 1.227  | 25.43 | 41.89 | 1.3946 | 24.58 | 62.56 |
| k90_19 | 33.23 | 1.4297 | 44.91 | 27.39 | 1.3409 | 25.70 | 15.20 | 1.3515 | 27.63 | 38.64 |
| k90_4  | 33.22 | 1.3853 | 44.36 | 26.84 | 1.2898 | 27.84 | 17.34 | 1.2965 | 22.95 | 33.96 |
| k9_19  | 6.05  | 1.4496 | 40.23 | 49.89 | 1.3086 | 23.10 | 39.77 | 1.4045 | 23.50 | 61.68 |
| k9_4   | 6.05  | 1.3172 | 40.51 | 50.16 | 1.3821 | 24.63 | 41.30 | 1.3363 | 20.98 | 59.16 |
| expr   | 33.14 |        |       |       | 1.3581 | 13.52 | 8.39  | 1.3418 | 20.21 | 0.00  |

**Table S2.** Final numerical data obtained for the best structures of CAT in C2 and P1 space groups

| 2:1 solvates |         |        | 2:1 solvates |         |        | 1:1 solvates |         |        |
|--------------|---------|--------|--------------|---------|--------|--------------|---------|--------|
| name         | density | Etotal | name         | density | Etotal | name         | density | Etotal |
| k10s_5       | 1.2825  | 18.91  | k10s_1       | 1.2844  | 15.60  | k10s_1_1     | 1.2778  | 20.39  |
| k14s_5       | 1.3111  | 28.86  | k14s_1       | 1.288   | 28.62  | k10s_1_5     | 1.2988  | 24.46  |
| k15s_5       | 1.3015  | 17.98  | k15s_1       | 1.2568  | 20.86  | k15s_1_1     | 1.2949  | 41.56  |
| k16s_5       | 1.2275  | 21.28  | k16s_1       | 1.2391  | 23.18  | k15s_1_5     | 1.392   | 21.57  |
| k17s_5       | 1.2296  | 21.85  | k17s_1       | 1.215   | 29.10  | k16s_1_1     | 1.2819  | 44.71  |
| k18s_5       | 1.301   | 14.41  | k18s_1       | 1.2622  | 19.23  | k16s_1_5     | 1.3617  | 23.01  |
| k19s_5       | 1.3371  | 19.83  | k19s_1       | 1.2861  | 30.91  | k18s_1_1     | 1.3084  | 19.99  |
| k1s_5        | 1.338   | 22.05  | k1s_1        | 1.3051  | 24.18  | k18s_1_5     | 1.3289  | 22.01  |
| k20s_5       | 1.33    | 23.45  | k20s_1       | 1.2938  | 22.66  | k19s_1_1     | 1.3426  | 28.60  |
| k21s_5       | 1.3207  | 17.83  | k21s_1       | 1.3356  | 17.66  | k19s_1_5     | 1.3179  | 17.74  |
| k22s_5       | 1.2978  | 22.29  | k22s_1       | 1.3468  | 17.98  | k20s_1_1     | 1.3755  | 30.33  |
| k23s_5       | 1.2506  | 24.49  | k23s_1       | 1.3001  | 34.85  | k20s_1_5     | 1.3234  | 19.62  |
| k24s_5       | 1.2967  | 17.28  | k24s_1       | 1.338   | 21.52  | k21s_1_1     | 1.3278  | 38.63  |
| k25s_5       | 1.1992  | 31.15  | k25s_1       | 1.2866  | 34.27  | k21s_1_5     | 1.4249  | 18.78  |
| k26s_5       | 1.3011  | 31.34  | k26s_1       | 1.2819  | 39.83  | k22s_1_1     | 1.2984  | 25.00  |
| k27s_5       | 1.2826  | 23.10  | k27s_1       | 1.3071  | 19.75  | k22s_1_5     | 1.3586  | 18.70  |
| k28s_5       | 1.2599  | 23.00  | k28s_1       | 1.3239  | 25.35  | k24s_1_1     | 1.3077  | 33.13  |
| k29s_5       | 1.2969  | 30.56  | k29s_1       | 1.2905  | 25.82  | k24s_1_5     | 1.3451  | 15.08  |
| k2s_5        | 1.306   | 19.12  | k2s_1        | 1.2944  | 22.35  | k36s_1_1     | 1.3364  | 41.08  |
| k30s_5       | 1.3378  | 34.22  | k30s_1       | 1.3262  | 39.21  | k36s_1_5     | 1.3458  | 36.25  |
| k35s_5       | 1.2918  | 31.58  | k35s_1       | 1.3498  | 25.02  | k3s_1_1      | 1.2967  | 47.15  |
| k36s_5       | 1.279   | 31.92  | k36s_1       | 1.314   | 31.14  | k3s_1_5      | 1.3809  | 24.11  |

|        |        |       |        |        |       |          |        |       |
|--------|--------|-------|--------|--------|-------|----------|--------|-------|
| k37s_5 | 1.3706 | 26.32 | k37s_1 | 1.3048 | 24.31 | k42s_1_1 | 1.3211 | 43.33 |
| k38s_5 | 1.2557 | 32.18 | k38s_1 | 1.318  | 22.49 | k42s_1_5 | 1.3172 | 35.24 |
| k3s_5  | 1.371  | 23.74 | k3s_1  | 1.2738 | 38.61 | k45s_1_1 | 1.3245 | 33.70 |
| k40s_5 | 1.2968 | 24.14 | k40s_1 | 1.2532 | 32.21 | k45s_1_5 | 1.3747 | 19.42 |
| k42s_5 | 1.2958 | 20.22 | k42s_1 | 1.3087 | 38.24 | k4s_1_1  | 1.3228 | 37.68 |
| k43s_5 | 1.2343 | 30.84 | k43s_1 | 1.2164 | 35.92 | k4s_1_5  | 1.3952 | 25.31 |
| k45s_5 | 1.3316 | 18.38 | k45s_1 | 1.2949 | 37.85 | k58s_1_1 | 1.3259 | 45.21 |
| k4s_5  | 1.2815 | 21.31 | k4s_1  | 1.2589 | 24.63 | k58s_1_5 | 1.3699 | 28.29 |
| k51s_5 | 1.3326 | 25.03 | k51s_1 | 1.3342 | 21.26 | k5s_1_1  | 1.3245 | 33.75 |
| k54s_5 | 1.2515 | 23.83 | k54s_1 | 1.2747 | 27.23 | k5s_1_5  | 1.3747 | 19.44 |
| k56s_5 | 1.1725 | 28.08 | k56s_1 | 1.3454 | 24.62 | k60s_1_1 | 1.2597 | 42.80 |
| k58s_5 | 1.2485 | 18.13 | k58s_1 | 1.2914 | 32.18 | k60s_1_5 | 1.2908 | 39.15 |
| k5s_5  | 1.2984 | 22.44 | k5s_1  | 1.2948 | 37.87 | k64s_1_1 | 1.3306 | 42.89 |
| k60s_5 | 1.2805 | 26.90 | k60s_1 | 1.2559 | 11.57 | k64s_1_5 | 1.3407 | 32.34 |
| k61s_5 | 1.3401 | 25.62 | k61s_1 | 1.2828 | 27.40 | k74s_1_1 | 1.2802 | 38.99 |
| k63s_5 | 1.2694 | 31.85 | k63s_1 | 1.3062 | 27.73 | k74s_1_5 | 1.3589 | 31.57 |
| k64s_5 | 1.3914 | 19.73 | k64s_1 | 1.283  | 28.68 | k7s_1_1  | 1.3374 | 28.86 |
| k65s_5 | 1.2811 | 28.91 | k65s_1 | 1.3318 | 29.49 | k7s_1_5  | 1.3976 | 10.13 |
| k66s_5 | 1.1966 | 34.87 | k66s_1 | 1.2502 | 36.66 | k80s_1_1 | 1.3364 | 41.05 |
| k68s_5 | 1.2373 | 21.40 | k68s_1 | 1.3293 | 23.83 | k80s_1_5 | 1.3837 | 28.17 |
| k6s_5  | 1.2979 | 26.96 | k6s_1  | 1.3499 | 24.93 | k8s_1_1  | 1.3635 | 26.32 |
| k72s_5 | 1.2783 | 32.62 | k72s_1 | 1.3207 | 39.67 | k8s_1_5  | 1.392  | 22.16 |
| k74s_5 | 1.297  | 29.33 | k74s_1 | 1.3517 | 22.78 |          |        |       |
| k78s_5 | 1.3219 | 30.89 | k78s_1 | 1.2532 | 32.22 |          |        |       |
| k79s_5 | 1.2931 | 33.54 | k79s_1 | 1.3261 | 39.15 |          |        |       |
| k7s_5  | 1.3614 | 6.87  | k7s_1  | 1.281  | 29.65 |          |        |       |
| k80s_5 | 1.2814 | 22.46 | k80s_1 | 1.3141 | 31.13 |          |        |       |
| k83s_5 | 1.3401 | 31.54 | k83s_1 | 1.3342 | 44.70 |          |        |       |
| k8s_5  | 1.2791 | 27.89 | k8s_1  | 1.3038 | 32.25 |          |        |       |

## 6. Numerical data for EPI

**Table S3.** Final numerical data obtained for the best structures of EPI in  $P2_1$  and  $P2_12_12_1$  space groups, together with relative energies obtained from the gas phase calculations ( $E_{intra}$ ).

| name   | unsolvated  |         |             | 2:1 solvates |         |             | 1:1 solvates |         |             |             |
|--------|-------------|---------|-------------|--------------|---------|-------------|--------------|---------|-------------|-------------|
|        | $E_{intra}$ | density | $E_{total}$ | $E_{inter}$  | density | $E_{total}$ | $E_{inter}$  | density | $E_{total}$ | $E_{inter}$ |
| e1_19  | 5.10        | 1.4367  | 35.99       | 35.94        | 1.3373  | 30.56       | 29.34        | 1.2747  | 32.45       | 28.84       |
| e10_19 | 5.05        | 1.497   | 0.00        | 0.00         | 1.3332  | 16.40       | 15.22        | 1.2917  | 30.16       | 26.60       |
| e11_19 | 4.05        | 1.4499  | 22.87       | 23.87        | 1.3343  | 21.42       | 21.25        | 1.3352  | 27.73       | 25.18       |
| e12_19 | 4.52        | 1.4523  | 37.68       | 38.21        | 1.3044  | 24.75       | 24.11        | 1.4192  | 23.62       | 20.58       |
| e13_19 | 7.48        | 1.3526  | 38.05       | 35.62        | 1.3532  | 26.92       | 23.32        | 1.307   | 26.84       | 20.85       |
| e14_19 | 4.35        | 1.4348  | 32.17       | 32.87        | 1.2718  | 23.43       | 22.96        | 1.3814  | 26.19       | 23.33       |
| e15_19 | 6.26        | 1.3593  | 36.92       | 35.71        | 1.3539  | 29.76       | 27.37        | 1.4245  | 23.56       | 18.78       |
| e16_19 | 5.12        | 1.4187  | 28.08       | 28.01        | 1.3774  | 26.30       | 25.06        | 1.3673  | 28.87       | 25.25       |
| e17_19 | 9.56        | 1.4177  | 35.39       | 30.88        | 1.3276  | 22.46       | 16.79        | 1.4072  | 30.23       | 22.16       |



|        |       |        |       |       |        |       |       |        |       |       |
|--------|-------|--------|-------|-------|--------|-------|-------|--------|-------|-------|
| e18_19 | 8.68  | 1.375  | 29.05 | 25.42 | 1.3302 | 18.69 | 13.90 | 1.4111 | 28.46 | 21.27 |
| e19_19 | 6.62  | 1.4897 | 8.99  | 7.42  | 1.2978 | 29.21 | 26.48 | 1.3842 | 31.32 | 26.19 |
| e2_19  | 5.12  | 1.3561 | 27.50 | 27.43 | 1.2378 | 23.60 | 22.36 | 1.4065 | 27.90 | 24.27 |
| e20_19 | 8.61  | 1.4046 | 40.87 | 37.31 | 1.3794 | 30.89 | 26.16 | 1.3046 | 30.68 | 23.56 |
| e21_19 | 8.26  | 1.3862 | 43.11 | 39.90 | 1.3368 | 26.71 | 22.35 | 1.3775 | 31.89 | 25.13 |
| e22_19 | 8.09  | 1.4759 | 20.76 | 17.72 | 1.3222 | 29.27 | 25.05 | 1.3159 | 28.19 | 21.59 |
| e23_19 | 8.65  | 1.4892 | 25.49 | 21.89 | 1.3206 | 21.94 | 17.17 | 1.443  | 23.38 | 16.22 |
| e24_19 | 24.24 | 1.4279 | 38.21 | 19.02 | 1.2861 | 36.91 | 16.55 | 1.33   | 38.64 | 15.88 |
| e25_19 | 24.12 | 1.3521 | 31.42 | 12.35 | 1.2917 | 33.06 | 12.82 | 1.3816 | 36.45 | 13.81 |
| e26_19 | 26.87 | 1.4699 | 41.59 | 19.77 | 1.3472 | 32.31 | 9.32  | 1.4045 | 33.68 | 8.30  |
| e27_19 | 0.11  | 1.3477 | 27.07 | 32.01 | 1.3411 | 13.26 | 17.03 | 1.416  | 21.83 | 23.21 |
| e28_19 | 26.99 | 1.4211 | 46.40 | 24.46 | 1.3167 | 34.84 | 11.73 | 1.4071 | 29.83 | 4.33  |
| e3_19  | 7.16  | 1.3884 | 38.55 | 36.44 | 1.3164 | 31.37 | 28.09 | 1.3991 | 28.82 | 23.15 |
| e31_19 | 1.89  | 1.47   | 28.97 | 32.13 | 1.2979 | 21.57 | 23.56 | 1.4228 | 21.73 | 21.33 |
| e35_19 | 3.36  | 1.3862 | 20.06 | 21.75 | 1.3568 | 22.58 | 23.10 | 1.4506 | 10.45 | 8.58  |
| e36_19 | 3.12  | 1.4015 | 22.95 | 24.88 | 1.3247 | 17.09 | 17.85 | 1.3288 | 27.37 | 25.74 |
| e37_19 | 19.10 | 1.4459 | 28.65 | 14.60 | 1.2602 | 29.31 | 14.09 | 1.3324 | 32.87 | 15.26 |
| e38_19 | 3.67  | 1.3936 | 38.51 | 39.89 | 1.2756 | 25.05 | 25.26 | 1.4143 | 21.95 | 19.77 |
| e39_19 | 22.33 | 1.3833 | 20.71 | 3.43  | 1.2875 | 22.55 | 4.10  | 1.3045 | 20.94 | 0.10  |
| e4_19  | 7.48  | 1.3866 | 26.03 | 23.60 | 1.3689 | 26.95 | 23.35 | 1.4294 | 26.37 | 20.38 |
| e40_19 | 5.85  | 1.4236 | 38.46 | 37.66 | 1.3466 | 25.28 | 23.31 | 1.365  | 18.10 | 13.74 |
| e44_19 | 7.62  | 1.4188 | 38.02 | 35.45 | 1.3088 | 20.68 | 16.93 | 1.3541 | 27.07 | 20.93 |
| e45_19 | 7.58  | 1.386  | 30.38 | 27.85 | 1.377  | 15.51 | 11.80 | 1.3959 | 30.30 | 24.20 |
| e46_19 | 23.69 | 1.4665 | 43.00 | 24.36 | 1.3462 | 25.32 | 5.52  | 1.2563 | 37.78 | 15.58 |
| e47_19 | 26.69 | 1.3306 | 42.92 | 21.28 | 1.3054 | 26.85 | 4.04  | 1.2965 | 38.39 | 13.19 |
| e48_19 | 23.23 | 1.3845 | 48.55 | 30.37 | 1.3573 | 27.31 | 7.96  | 1.3857 | 43.84 | 22.11 |
| e5_19  | 9.85  | 1.4456 | 38.91 | 34.11 | 1.3315 | 30.36 | 24.39 | 1.3354 | 32.46 | 24.09 |
| e51_19 | 23.72 | 1.3919 | 43.98 | 25.31 | 1.3123 | 33.98 | 14.14 | 1.4096 | 34.81 | 12.58 |
| e52_19 | 25.52 | 1.5146 | 35.24 | 14.77 | 1.3358 | 36.19 | 14.56 | 1.3596 | 33.42 | 9.39  |
| e54_19 | 14.43 | 1.3922 | 36.82 | 27.44 | 1.3959 | 36.34 | 25.79 | 1.3279 | 30.43 | 17.50 |
| e55_19 | 25.77 | 1.5169 | 34.72 | 14.00 | 1.3599 | 31.79 | 9.90  | 1.3708 | 36.09 | 11.81 |
| e6_19  | 8.42  | 1.4421 | 33.63 | 30.26 | 1.3336 | 21.34 | 16.79 | 1.3983 | 29.85 | 22.92 |
| e60_19 | 18.43 | 1.4512 | 28.26 | 14.88 | 1.3269 | 31.07 | 16.52 | 1.3451 | 36.17 | 19.22 |
| e61_19 | 19.13 | 1.4132 | 29.74 | 15.66 | 1.314  | 31.82 | 16.58 | 1.3441 | 34.32 | 16.68 |
| e62_19 | 18.65 | 1.3643 | 35.75 | 22.15 | 1.2897 | 27.83 | 13.06 | 1.3202 | 21.03 | 3.87  |
| e63_19 | 20.82 | 1.4647 | 22.43 | 6.66  | 1.3316 | 23.91 | 6.97  | 1.2889 | 33.05 | 13.72 |
| e64_19 | 20.64 | 1.4284 | 32.79 | 17.20 | 1.3382 | 31.37 | 14.62 | 1.3515 | 28.81 | 9.67  |
| e65_19 | 21.78 | 1.3923 | 32.60 | 15.87 | 1.3266 | 31.90 | 14.00 | 1.3542 | 30.67 | 10.37 |
| e68_19 | 22.47 | 1.3198 | 46.12 | 28.70 | 1.3847 | 28.86 | 10.28 | 1.289  | 34.13 | 13.15 |
| e69_19 | 24.68 | 1.4079 | 38.64 | 19.01 | 1.3616 | 33.87 | 13.07 | 1.3626 | 31.83 | 8.64  |
| e7_19  | 9.80  | 1.4882 | 33.22 | 28.47 | 1.3058 | 23.18 | 17.26 | 1.3467 | 35.66 | 27.35 |
| e72_19 | 33.66 | 1.459  | 51.66 | 23.05 | 1.3332 | 34.85 | 5.06  | 1.416  | 44.58 | 12.40 |
| e73_19 | 34.35 | 1.4508 | 47.34 | 18.04 | 1.334  | 35.51 | 5.03  | 1.3936 | 37.18 | 4.32  |
| e74_19 | 37.92 | 1.4368 | 52.92 | 20.05 | 1.3119 | 34.18 | 0.14  | 1.356  | 36.85 | 0.42  |
| e75_19 | 38.72 | 1.358  | 43.64 | 9.97  | 1.3296 | 36.19 | 1.35  | 1.3072 | 43.20 | 5.97  |
| e8_19  | 0.00  | 1.4304 | 23.18 | 28.23 | 1.3246 | 17.75 | 21.62 | 1.4284 | 20.07 | 21.56 |

|       |       |        |       |       |        |       |       |        |       |       |
|-------|-------|--------|-------|-------|--------|-------|-------|--------|-------|-------|
| e9_19 | 3.28  | 1.3992 | 28.67 | 30.44 | 1.4113 | 21.21 | 21.80 | 1.3453 | 25.11 | 23.32 |
| e1_4  | 5.09  | 1.4563 | 34.31 | 34.27 | 1.3031 | 30.11 | 28.89 | 1.4303 | 35.47 | 31.86 |
| e10_4 | 5.05  | 1.4734 | 15.13 | 15.13 | 1.3479 | 17.57 | 16.40 | 1.3724 | 21.18 | 17.62 |
| e11_4 | 4.05  | 1.435  | 26.15 | 27.15 | 1.3261 | 20.44 | 20.28 | 1.368  | 34.30 | 31.74 |
| e12_4 | 4.52  | 1.4826 | 38.89 | 39.42 | 1.3233 | 25.48 | 24.84 | 1.3905 | 26.09 | 23.06 |
| e13_4 | 7.48  | 1.3819 | 51.55 | 49.12 | 1.3125 | 27.38 | 23.77 | 1.3679 | 34.23 | 28.24 |
| e14_4 | 4.35  | 1.4357 | 35.08 | 35.78 | 1.3705 | 26.57 | 26.10 | 1.4007 | 33.60 | 30.74 |
| e15_4 | 6.27  | 1.3228 | 41.66 | 40.44 | 1.3455 | 25.44 | 23.06 | 1.3222 | 29.98 | 25.20 |
| e16_4 | 5.12  | 1.4107 | 38.43 | 38.36 | 1.3723 | 22.87 | 21.64 | 1.334  | 25.59 | 21.96 |
| e17_4 | 9.56  | 1.4713 | 48.34 | 43.83 | 1.3289 | 32.48 | 26.80 | 1.387  | 26.28 | 18.20 |
| e18_4 | 8.68  | 1.4235 | 43.72 | 40.09 | 1.3068 | 26.40 | 21.60 | 1.3099 | 29.05 | 21.86 |
| e19_4 | 6.62  | 1.4839 | 12.29 | 10.72 | 1.3204 | 29.57 | 26.84 | 1.3886 | 28.04 | 22.91 |
| e2_4  | 5.12  | 1.4739 | 32.60 | 32.53 | 1.2531 | 25.61 | 24.37 | 1.358  | 28.40 | 24.76 |
| e20_4 | 8.61  | 1.3756 | 38.28 | 34.72 | 1.3477 | 31.02 | 26.27 | 1.3358 | 35.21 | 28.09 |
| e21_4 | 8.25  | 1.422  | 46.71 | 43.51 | 1.305  | 28.86 | 24.49 | 1.3774 | 38.68 | 31.92 |
| e22_4 | 8.10  | 1.4757 | 23.26 | 20.21 | 1.3279 | 25.80 | 21.58 | 1.3428 | 30.68 | 25.90 |
| e23_4 | 8.65  | 1.4085 | 31.93 | 28.33 | 1.3629 | 29.34 | 24.57 | 1.3522 | 36.71 | 29.55 |
| e24_4 | 24.24 | 1.4045 | 45.67 | 26.48 | 1.2625 | 31.80 | 11.44 | 1.3018 | 27.69 | 4.94  |
| e25_4 | 24.13 | 1.4825 | 45.23 | 26.15 | 1.2851 | 38.24 | 18.00 | 1.3544 | 34.57 | 11.93 |
| e26_4 | 26.87 | 1.4484 | 49.03 | 27.21 | 1.3631 | 41.15 | 18.16 | 1.2742 | 38.43 | 13.05 |
| e27_4 | 0.11  | 1.4075 | 27.02 | 31.96 | 1.2613 | 20.90 | 24.67 | 1.3465 | 11.89 | 13.28 |
| e28_4 | 26.99 | 1.4096 | 46.14 | 24.20 | 1.2885 | 41.76 | 18.65 | 1.3783 | 38.88 | 13.38 |
| e3_4  | 7.16  | 1.3543 | 37.87 | 35.76 | 1.3275 | 31.12 | 27.84 | 1.419  | 34.46 | 28.78 |
| e31_4 | 1.89  | 1.4283 | 32.67 | 35.83 | 1.2841 | 17.81 | 19.80 | 1.3258 | 20.71 | 20.30 |
| e35_4 | 3.36  | 1.4237 | 20.90 | 22.59 | 1.2717 | 16.68 | 17.20 | 1.4625 | 12.22 | 10.35 |
| e36_4 | 3.12  | 1.4389 | 36.28 | 38.21 | 1.3163 | 12.89 | 13.65 | 1.434  | 32.24 | 30.61 |
| e37_4 | 19.10 | 1.4408 | 30.38 | 16.33 | 1.3742 | 15.22 | 0.00  | 1.324  | 24.12 | 6.51  |
| e38_4 | 3.67  | 1.4505 | 35.30 | 36.68 | 1.3444 | 22.65 | 22.86 | 1.3709 | 28.74 | 26.56 |
| e39_4 | 22.33 | 1.3789 | 38.08 | 20.80 | 1.2468 | 23.91 | 5.46  | 1.317  | 20.84 | 0.00  |
| e4_4  | 7.48  | 1.4169 | 29.12 | 26.69 | 1.3086 | 23.53 | 19.93 | 1.3683 | 32.55 | 26.56 |
| e40_4 | 5.85  | 1.437  | 40.59 | 39.79 | 1.3091 | 25.04 | 23.08 | 1.328  | 11.18 | 6.82  |
| e44_4 | 7.62  | 1.3577 | 38.27 | 35.70 | 1.3657 | 17.65 | 13.90 | 1.4055 | 33.50 | 27.37 |
| e45_4 | 7.59  | 1.3727 | 49.78 | 47.24 | 1.2541 | 21.19 | 17.49 | 1.3578 | 24.13 | 18.04 |
| e46_4 | 23.69 | 1.3311 | 51.20 | 32.56 | 1.3307 | 26.03 | 6.22  | 1.3488 | 37.90 | 15.71 |
| e47_4 | 26.69 | 1.3943 | 45.33 | 23.69 | 1.2841 | 37.36 | 14.55 | 1.3261 | 40.04 | 14.84 |
| e48_4 | 23.23 | 1.4339 | 35.73 | 17.55 | 1.3273 | 34.22 | 14.87 | 1.3797 | 49.12 | 27.38 |
| e5_4  | 9.86  | 1.3993 | 32.09 | 27.28 | 1.3422 | 31.25 | 25.28 | 1.2856 | 33.90 | 25.54 |
| e51_4 | 23.73 | 1.4568 | 57.95 | 39.27 | 1.3694 | 38.60 | 18.76 | 1.3888 | 41.97 | 19.74 |
| e52_4 | 25.51 | 1.4965 | 35.72 | 15.26 | 1.3351 | 35.85 | 14.22 | 1.3056 | 31.53 | 7.51  |
| e54_4 | 14.43 | 1.438  | 52.15 | 42.77 | 1.3645 | 27.70 | 17.15 | 1.3825 | 42.44 | 29.50 |
| e55_4 | 25.78 | 1.4937 | 42.49 | 21.77 | 1.3506 | 30.86 | 8.97  | 1.3791 | 32.36 | 8.08  |
| e6_4  | 8.42  | 1.4215 | 41.28 | 37.91 | 1.2897 | 23.48 | 18.94 | 1.3715 | 39.18 | 32.24 |
| e60_4 | 18.43 | 1.4312 | 38.07 | 24.69 | 1.3539 | 35.04 | 20.49 | 1.3439 | 39.97 | 23.02 |
| e61_4 | 19.13 | 1.4009 | 39.11 | 25.03 | 1.3011 | 35.42 | 20.17 | 1.3236 | 34.12 | 16.48 |
| e62_4 | 18.65 | 1.365  | 35.88 | 22.28 | 1.3266 | 21.50 | 6.74  | 1.4433 | 21.39 | 4.23  |
| e63_4 | 20.82 | 1.4696 | 15.90 | 0.13  | 1.3212 | 37.66 | 20.72 | 1.3817 | 31.88 | 12.55 |

|       |       |        |       |       |        |       |       |        |       |       |
|-------|-------|--------|-------|-------|--------|-------|-------|--------|-------|-------|
| e64_4 | 20.63 | 1.4248 | 41.89 | 26.31 | 1.3291 | 24.62 | 7.86  | 1.3805 | 32.70 | 13.55 |
| e65_4 | 21.78 | 1.4418 | 41.74 | 25.01 | 1.3331 | 25.40 | 7.50  | 1.2612 | 37.07 | 16.78 |
| e68_4 | 22.46 | 1.3069 | 53.17 | 35.76 | 1.348  | 33.41 | 14.83 | 1.3427 | 39.43 | 18.46 |
| e69_4 | 24.68 | 1.3811 | 48.75 | 29.12 | 1.3227 | 27.79 | 6.99  | 1.2642 | 28.09 | 4.90  |
| e7_4  | 9.80  | 1.4797 | 42.91 | 38.16 | 1.3393 | 22.00 | 16.08 | 1.4119 | 33.45 | 25.14 |
| e72_4 | 33.67 | 1.3526 | 57.29 | 28.67 | 1.3092 | 35.45 | 5.66  | 1.3616 | 47.46 | 15.27 |
| e73_4 | 34.36 | 1.3617 | 47.96 | 18.65 | 1.2977 | 36.39 | 5.91  | 1.3243 | 43.64 | 10.77 |
| e74_4 | 37.92 | 1.4267 | 55.44 | 22.57 | 1.3488 | 48.07 | 14.03 | 1.3239 | 52.79 | 16.36 |
| e75_4 | 38.73 | 1.4444 | 52.87 | 19.20 | 1.2988 | 45.39 | 10.55 | 1.3427 | 47.47 | 10.24 |
| e8_4  | 0.00  | 1.4501 | 27.81 | 32.86 | 1.2828 | 17.55 | 21.42 | 1.4405 | 25.31 | 26.79 |
| e9_4  | 3.28  | 1.4129 | 29.73 | 31.50 | 1.3168 | 13.20 | 13.80 | 1.3975 | 21.45 | 19.66 |
| expr  | 5.05  | 1.4968 | 0.00  | 0.00  |        |       |       |        |       |       |

**Table S4.** Final numerical data obtained for the best structures of EPI in C2 and P1 space groups

| 2:1 solvates |         |        | 2:1 solvates |         |        | 1:1 solvates |         |        |
|--------------|---------|--------|--------------|---------|--------|--------------|---------|--------|
| name         | density | Etotal | name         | density | Etotal | name         | density | Etotal |
| e10s_1       | 1.2366  | 29.98  | e10s_5       | 1.2053  | 18.48  | e10_1_1      | 1.3622  | 23.62  |
| e11s_1       | 1.3334  | 27.35  | e11s_5       | 1.2402  | 22.37  | e10_1_5      | 1.3755  | 36.65  |
| e12s_1       | 1.2522  | 28.58  | e12s_5       | 1.2397  | 23.56  | e11_1_1      | 1.2538  | 37.56  |
| e13s_1       | 1.2667  | 38.67  | e13s_5       | 1.2598  | 26.46  | e11_1_5      | 1.2947  | 31.89  |
| e14s_1       | 1.2834  | 29.01  | e14s_5       | 1.2887  | 32.5   | e12_1_1      | 1.2425  | 42.74  |
| e15s_1       | 1.2749  | 31.84  | e15s_5       | 1.2872  | 30.25  | e12_1_5      | 1.347   | 29.25  |
| e16s_1       | 1.3177  | 31.38  | e16s_5       | 1.3166  | 29.04  | e13_1_1      | 1.247   | 45.73  |
| e17s_1       | 1.3113  | 29.21  | e17s_5       | 1.3216  | 22.11  | e13_1_5      | 1.2692  | 43.13  |
| e18s_1       | 1.3267  | 32.78  | e18s_5       | 1.2963  | 28.49  | e14_1_1      | 1.305   | 48.23  |
| e19s_1       | 1.2822  | 26.32  | e19s_5       | 1.3146  | 28.9   | e14_1_5      | 1.2725  | 38.81  |
| e1s_1        | 1.3265  | 34.12  | e1s_5        | 1.2626  | 25.8   | e15_1_1      | 1.3092  | 43.55  |
| e20s_1       | 1.3482  | 29.61  | e20s_5       | 1.3066  | 28.41  | e15_1_5      | 1.3556  | 46.30  |
| e21s_1       | 1.3579  | 30.98  | e21s_5       | 1.2449  | 30.24  | e16_1_1      | 1.2802  | 41.38  |
| e22s_1       | 1.3019  | 25.77  | e22s_5       | 1.3058  | 35.3   | e16_1_5      | 1.3459  | 37.61  |
| e23s_1       | 1.2513  | 30.97  | e23s_5       | 1.2184  | 20.6   | e17_1_1      | 1.3032  | 38.04  |
| e24s_1       | 1.2729  | 38.6   | e24s_5       | 1.3251  | 37.3   | e17_1_5      | 1.2993  | 44.60  |
| e25s_1       | 1.3046  | 51.77  | e25s_5       | 1.3972  | 36.7   | e18_1_1      | 1.1783  | 44.04  |
| e26s_1       | 1.2686  | 38.51  | e26s_5       | 1.3943  | 37.82  | e18_1_5      | 1.2951  | 42.52  |
| e27s_1       | 1.2626  | 22.25  | e27s_5       | 1.3107  | 17.28  | e19_1_1      | 1.346   | 37.06  |
| e28s_1       | 1.3487  | 46.74  | e28s_5       | 1.2917  | 25.71  | e19_1_5      | 1.2914  | 37.42  |
| e2s_1        | 1.3094  | 34.1   | e2s_5        | 1.2147  | 19.5   | e2_1_1       | 1.2679  | 50.43  |
| e31s_1       | 1.3801  | 18.83  | e31s_5       | 1.2805  | 20.81  | e2_1_5       | 1.2649  | 35.41  |
| e35s_1       | 1.2292  | 18.63  | e35s_5       | 1.3166  | 18.41  | e22_1_1      | 1.337   | 31.62  |
| e36s_1       | 1.2923  | 21.35  | e36s_5       | 1.2542  | 12.11  | e22_1_5      | 1.3147  | 41.02  |
| e37s_1       | 1.2281  | 33.05  | e37s_5       | 1.3323  | 24.2   | e23_1_1      | 1.3703  | 39.40  |
| e38s_1       | 1.293   | 25.56  | e38s_5       | 1.2931  | 24.64  | e23_1_5      | 1.2876  | 34.53  |
| e39s_1       | 1.3329  | 19.16  | e39s_5       | 1.2447  | 21.42  | e24_1_1      | 1.2722  | 55.65  |
| e3s_1        | 1.341   | 35.18  | e3s_5        | 1.3319  | 21.38  | e24_1_5      | 1.3301  | 46.28  |
| e40s_1       | 1.2887  | 26.63  | e40s_5       | 1.2944  | 18     | e27_1_1      | 1.3091  | 43.51  |

|        |        |       |        |        |       |         |        |       |
|--------|--------|-------|--------|--------|-------|---------|--------|-------|
| e44s_1 | 1.3343 | 24.47 | e44s_5 | 1.2952 | 27.97 | e27_1_5 | 1.2791 | 23.95 |
| e45s_1 | 1.3069 | 30.5  | e45s_5 | 1.292  | 19.93 | e28_1_1 | 1.3705 | 44.96 |
| e46s_1 | 1.2847 | 37.29 | e46s_5 | 1.2478 | 38.35 | e28_1_5 | 1.2448 | 50.75 |
| e47s_1 | 1.3118 | 27.33 | e47s_5 | 1.2382 | 37.42 | e3_1_1  | 1.341  | 48.07 |
| e48s_1 | 1.316  | 46.07 | e48s_5 | 1.2361 | 41.05 | e3_1_5  | 1.3064 | 39.86 |
| e4s_1  | 1.3186 | 28.51 | e4s_5  | 1.2937 | 24.31 | e31_1_1 | 1.3843 | 38.13 |
| e54s_1 | 1.2885 | 33.53 | e54s_5 | 1.2758 | 29.72 | e31_1_5 | 1.3284 | 30.17 |
| e55s_1 | 1.2853 | 30.91 | e55s_5 | 1.3141 | 36.73 | e35_1_1 | 1.4009 | 23.35 |
| e5s_1  | 1.3087 | 31.12 | e5s_5  | 1.1826 | 32.69 | e35_1_5 | 1.3014 | 25.69 |
| e60s_1 | 1.3348 | 46.76 | e60s_5 | 1.3051 | 29.85 | e36_1_1 | 1.2564 | 34.85 |
| e61s_1 | 1.302  | 29.39 | e61s_5 | 1.2526 | 29.95 | e36_1_5 | 1.2439 | 25.89 |
| e62s_1 | 1.2324 | 33.6  | e62s_5 | 1.2378 | 27.87 | e37_1_1 | 1.3211 | 45.44 |
| e63s_1 | 1.2658 | 31.23 | e63s_5 | 1.2269 | 38.1  | e37_1_5 | 1.3955 | 34.94 |
| e64s_1 | 1.3522 | 22.35 | e64s_5 | 1.2623 | 22.98 | e4_1_1  | 1.3235 | 37.79 |
| e65s_1 | 1.3134 | 32.99 | e65s_5 | 1.2271 | 34.56 | e4_1_5  | 1.3337 | 34.93 |
| e69s_1 | 1.2359 | 21.18 | e69s_5 | 1.253  | 19.74 | e54_1_1 | 1.2882 | 49.66 |
| e6s_1  | 1.2925 | 36.35 | e6s_5  | 1.2451 | 34.86 | e54_1_5 | 1.3504 | 43.50 |
| e75s_1 | 1.3497 | 43.81 | e75s_5 | 1.2291 | 35.84 | e6_1_1  | 1.2833 | 42.67 |
| e7s_1  | 1.316  | 33.99 | e7s_5  | 1.2966 | 26.71 | e6_1_5  | 1.2913 | 40.90 |
| e8s_1  | 1.323  | 28.62 | e8s_5  | 1.3681 | 25.1  | e62_1_1 | 1.3597 | 54.35 |
| e9s_1  | 1.3223 | 17.39 | e9s_5  | 1.3158 | 14.34 | e62_1_5 | 1.3443 | 38.77 |
|        |        |       |        |        |       | e64_1_1 | 1.2795 | 30.78 |
|        |        |       |        |        |       | e64_1_5 | 1.258  | 37.21 |
|        |        |       |        |        |       | e69_1_1 | 1.3577 | 37.39 |
|        |        |       |        |        |       | e69_1_5 | 1.32   | 38.02 |
|        |        |       |        |        |       | e8_1_1  | 1.2389 | 44.07 |
|        |        |       |        |        |       | e8_1_5  | 1.2547 | 37.11 |
|        |        |       |        |        |       | e9_1_1  | 1.2845 | 37.10 |
|        |        |       |        |        |       | e9_1_5  | 1.2593 | 28.68 |
|        |        |       |        |        |       | e38_1_1 | 1.2951 | 40.81 |
|        |        |       |        |        |       | e38_1_5 | 1.3322 | 35.72 |
|        |        |       |        |        |       | e39_1_1 | 1.23   | 40.39 |
|        |        |       |        |        |       | e39_1_5 | 1.2931 | 41.92 |
|        |        |       |        |        |       | e40_1_1 | 1.2828 | 49.73 |
|        |        |       |        |        |       | e40_1_5 | 1.2919 | 33.90 |
|        |        |       |        |        |       | e44_1_1 | 1.2505 | 43.78 |
|        |        |       |        |        |       | e44_1_5 | 1.3804 | 38.75 |
|        |        |       |        |        |       | e45_1_1 | 1.234  | 52.31 |
|        |        |       |        |        |       | e45_1_5 | 1.3359 | 34.81 |

---

<sup>1</sup> Marta K. Dudek, Piotr Paluch, Justyna Sniechowska, Karol Nartowski, Graeme M. Day, Marek J. Potrzebowski. Joint solid-state NMR – crystal structure prediction approach to determine crystal structure of new catechin solvates (*in preparation*)
